# Supplementary material
Source: Elsevier journal article supplement (https://www.sciencedirect.com/science/article/pii/S0034745020300949)
Supplement: mmc1 [file S0034745020300949:mmc1.docx]

| **Tabla Suplementaria 1. Perfil neuropsicológico de pacientes con trastorno afectivo bipolar tipo I (TAB-I)** | | | | | | | | | | | | | | | | | | |
| --- | --- | --- | --- | --- | --- | --- | --- | --- | --- | --- | --- | --- | --- | --- | --- | --- | --- | --- |
| **VARIABLE NEUROPSICOLÓGICA** | **LITIO**  **N=22 (45,6%)** | | **NO LITIO**  **N=26 (54,2%)** | | | **DME** | | **DMEa** | | **IC 95%** | | | | **Valor s** | | **Valor p** | |
| **Mediana** | **RIQ** | **Mediana** | **RIQ** |  | |  | |  | | | |  | |  | |
| **Coeficiente intelectual** |  |  |  |  |  | |  | |  | | | |  | |  | |
| Verbal | 87,5 | [74 - 98] | 87,5 | [73 - 95] | 0,06 | | -0,08 | | -0,64 | | - | 0,48 | 0,08 | | 0,94 | |
| Manipulativo | 78 | [69 - 89] | 75 | [70 - 85] | 0,24 | | -0,09 | | -0,65 | | - | 0,47 | 0,886 | | 0,54 | |
| Total | 81 | [73 - 92] | 79,5 | [70 -90] | 0,13 | | -0,1 | | -0,68 | | - | 0,46 | 0,49 | | 0,70 | |
| **TMT** |  |  |  | | | | | | | | | | | | | |
| A | 78 | [49 - 89] | 70 | [54 - 88] | 0,16 | | 0,6 | | 0,01 | | - | 1,18 | 0,04 | | 0,88 | |
| B | 119 | [75 - 208] | 152 | [103-183] | 0,20 | | 0,17 | | -0,45 | |  | 0,8 | 0,42 | | 1,24 | |
| **TAVEC** |  |  |  |  |  | |  | |  | |  |  |  | |  | |
| Recuerdo lista A (E1) | 6 | [5 - 8] | 5 | [4-8] | 0,01 | | -0,14 | | -0,71 | | - | 0,42 | 0,30 | | 0,80 | |
| Recuerdo total lista A | 49,5 | [41 - 58] | 51 | [41-58] | 0,18 | | -0,47 | | -1 | | - | 0,1 | 0,12 | | 0,91 | |
| Recuerdo libre (CP) | 9,50 | [7 - 13] | 10 | [9- 11] | 0,08 | | -0,2 | | -0,77 | | - | 0,36 | 0,54 | | 0,68 | |
| Recuerdo Libre (LP) | 11,5 | [8-14] | 11 | [8-13] | 0,03 | | -0,43 | | -1 | | - | 0,1 | 0,39 | | 0,76 | |
| Recuerdo con clave (CP) | 12 | [10- 14] | 11,5 | [9-14] | 0,02 | | -0,17 | | -0,7 | | - | 0,39 | 0,43 | | 0,73 | |
| Recuerdo con clave (LP) | 12 | [10- 14] | 12 | [10-14] | 0,17 | | -0,5 | | -1,1 | | - | 0,08 | 0,36 | | 0,77 | |
| Reconocimiento | 15,5 | [14- 16] | 16 | [14-16] | 0,13 | | -0,38 | | -0,95 | | - | 0,19 | 0,01 | | 0,99 | |
| **Cubos de Corsi** |  |  |  |  |  | |  | |  | |  |  |  | |  | |
| Orden directo | 6 | [4- 8] | 6 | [5- 7] | 0,07 | | -0,25 | | -0,81 | | - | 0,32 | 0,24 | | 0,84 | |
| Orden inverso | 5 | [4-6] | 5 | [4-6] | 0,17 | | -0,56 | | -1,14 | | - | 0,01 | 0,86 | | 0,54 | |
| **Weschler (Memoria)** |  |  |  |  |  | |  | |  | |  |  |  | |  | |
| Recuerdo inmediato | 9,5 | [7,6- 14] | 12 | [9,6-14] | 0,37 | | -0,71 | | -1,30 | | - | -0,13 | 2,70 | | 0,15 | |
| Recuerdo diferido | 9,2 | [6,6-13] | 10,5 | [7,8- 12] | 0,17 | | -0,6 | | -1,2 | | - | -0,01 | 1,42 | | 0,37 | |
| Reconocimiento | 16 | [15- 19,7] | 19 | [17,2- 20] | 0,54 | | -0,94 | | -1,54 | | - | -0,34 | 3,29 | | 0,10 | |
| **Fluidez verbal** |  |  |  |  |  | |  | |  | |  |  |  | |  | |
| Semántica | 32,5 | [28-36,7] | 30 | [25-36] | 0,40 | | 0,12 | | -0,44 | | - | 0,69 | 2,35 | | 0,19 | |
| Fonológica | 33,5 | [21- 39] | 33,5 | [24-39] | 0,01 | | -0,4 | | -0,97 | | - | 0,17 | 0,18 | | 0,87 | |
| **Figura de Rey** |  |  |  |  |  | |  | |  | |  |  |  | |  | |
| Copia | 31 | [29- 34] | 32 | [30- 34] | 0,04 | | -0,18 | | -0,75 | | - | 0,38 | 0,87 | | 0,54 | |
| Tiempo de copia | 196,5 | [130- 262] | 211 | [171-251] | 0,24 | | 0,42 | | -0,15 | | - | 0,1 | 1,44 | | 0,36 | |
| Evocación | 17 | [10,5- 23] | 13,5 | [9,6-19] | 0,48 | | 0,03 | | -0,53 | | - | 0,6 | 2,96 | | 0,12 | |
| Tiempo de evocación | 117,5 | [102- 1] | 136 | [106-191] | 0,50 | | -0,26 | | -0,83 | | - | 0,3 | 2,78 | | 0,14 | |
| **Wisconsin** |  |  |  |  |  | |  | |  | |  |  |  | |  | |
| Aciertos | 71 | [66,5- 79] | 74 | [65,7- 80] | 0,12 | | 0,13 | | -0,44 | | - | 0,69 | 0,40 | | 0,75 | |
| Errores | 45,5 | [20-58] | 40,5 | [28,3 53] | 0,05 | | 0.48 | | -0.1 | | - | 1,05 | 0,40 | | 0,75 | |
| Categorías | 5 | [4- 6] | 4 | [3,2-6] | 0,16 | | -0,08 | | -0,65 | | - | 0,48 | 0,54 | | 0,68 | |
| Perseveración (%) | 18,4 | [9,1- 23] | 17,9 | [9,5- 25] | 0,17 | | 0,76 | | 0,17 | | - | 1,35 | 0,09 | | 0,93 | |
| Conceptualización (%) | 47 | [41-67] | 51 | [42-68] | 0,01 | | 0,37 | | -0,21 | | - | 0,96 | 0,11 | | 0,92 | |
| Errores perseverativos | 0 | [0-1] | 1 | [0-2] | 0,60 | | -0,69 | | -1,28 | | - | -0,11 | 4,96 | | 0,03 | |
| Ensayos | 128 | [92- 128] | 128 | [100- 128] | 0,02 | | 0,31 | | -0,26 | | - | 0,89 | 0,25 | | 0,84 | |
| Abreviaturas: RIQ=Rango intercuartil, DME=Diferencia de medias estandarizada, DMEa= DME ajustada por edad sexo, escolaridad, enfermedad cardiovascular, número de episodios maniacos, antecedente de psicosis, intento suicida, uso de benzodiacepinas, alcohol y otras sustancias psicoactivas TAVEC= Test de Aprendizaje Verbal de California, E1= ensayo 1, CP= corto plazo, LP= largo plazo. | | | | | | | | | | | | | | | | | | |

| **Tabla Suplementaria 2. Superficie en mm2 de regiones corticales de interés de pacientes con trastorno afectivo bipolar tipo I (TAB-I) según cada lóbulo cerebral** | | | | | | | | | | | | |
| --- | --- | --- | --- | --- | --- | --- | --- | --- | --- | --- | --- | --- |
| **REGIÓN** | **LITIO**  **(N=22,45,6%)** | | **NO LITIO**  **(N=26, 54,2%)** | | **DME** | **DMEa** | **IC 95%** | | | **Valor s** | **Valor p** | |
| **Media** | **DE** | **Media** | **DE** |
| **Frontal** |  |  |  |  |  |  |  |  |  |  |  | |
| Corteza cingulada anterior caudal derecha | 762 | 150 | 742 | 178 | 0,12 | 0,12 | -0,45 | - | 0,69 | 0,56 | 0,68 | |
| Corteza cingulada anterior caudal izquierda | 618 | 100 | 570 | 136 | 0,40 | 0,35 | -0,23 | - | 0,92 | 2,48 | 0,18 | |
| Cíngulo anterior derecho | 620 | 115 | 665 | 144 | 0,34 | -0,19 | -0,76 | - | 0,38 | 2,01 | 0,25 | |
| Cíngulo anterior izquierdo | 875 | 142 | 730 | 114 | 1,12 | 1,32 | 0,70 | - | 1,95 | 13,29 | **<0,01** | |
| Giro frontal medio caudal derecha | 2009 | 458 | 1862 | 302 | 0,38 | 0,46 | -0,11 | - | 1,04 | 2,40 | 0,19 | |
| Giro frontal medio caudal izquierdo | 2233 | 446 | 1941 | 276 | 0,79 | 0,81 | 0,22 | - | 1,41 | 6,97 | **0,01** | |
| Giro frontal medio rostral derecho | 5345 | 778 | 5104 | 646 | 0,34 | 0,23 | -0,34 | - | 0,80 | 2,02 | 0,25 | |
| Giro frontal medio rostral izquierdo | 5279 | 758 | 4906 | 760 | 0,49 | 0,50 | -0,07 | - | 1,08 | 3,38 | 0,10 | |
| Giro frontal superior derecho | 6773 | 930 | 6132 | 589 | 0,82 | 0,85 | 0,25 | - | 1,44 | 7,38 | **0,01** | |
| Giro frontal superior izquierdo | 6841 | 735 | 6351 | 693 | 0,69 | 0,88 | 0,28 | - | 1,47 | 5,51 | **0,02** | |
| Corteza orbitofrontal lateral derecha | 2499 | 397 | 2303 | 286 | 0,57 | 0,48 | -0,10 | - | 1,05 | 4,24 | 0,05 | |
| Corteza orbitofrontal lateral izquierda | 2530 | 335 | 2331 | 303 | 0,63 | 0,5 | -0,08 | - | 1,08 | 4,80 | **0,04** | |
| Corteza orbitofrontal medial derecha | 1854 | 180 | 1649 | 172 | 1,17 | 1,08 | 0,47 | - | 1,69 | 9,97 | **<0,01** | |
| Corteza orbitofrontal medial izquierda | 1822 | 270 | 1718 | 195 | 0,44 | 0,51 | -0,07 | - | 1,09 | 2,98 | 0,13 | |
| Lóbulo paracentral derecho | 1520 | 224 | 1440 | 212 | 0,37 | 0,55 | -0,03 | - | 1,12 | 2,24 | 0,21 | |
| Lóbulo paracentral izquierdo | 1360 | 185 | 1299 | 145 | 0,37 | 0,38 | -0,20 | - | 0,95 | 2,29 | 0,21 | |
| Pars opercularis derecha | 1376 | 252 | 1231 | 184 | 0,66 | 0,67 | 0,08 | - | 1,25 | 5,27 | **0,03** | |
| Pars opercularis izquierda | 1658 | 362 | 1515 | 209 | 0,48 | 0,53 | -0,05 | - | 1,11 | 3,41 | 0,09 | |
| Pars orbitalis derecha | 763 | 130 | 720 | 108 | 0,37 | 0,45 | -0,13 | - | 1,02 | 2,26 | 0,21 | |
| Pars orbitalis izquierda | 642 | 105 | 570 | 73 | 0,80 | 0,78 | 0,19 | - | 1,37 | 6,97 | **0,01** | |
| Pars triangularis derecha | 1498 | 275 | 1333 | 214 | 0,67 | 0,77 | 0,18 | - | 1,36 | 5,38 | **0,02** | |
| Pars triangularis izquierda | 1252 | 179 | 1210 | 142 | 0,26 | 0,10 | -0,47 | - | 0,67 | 1,45 | 0,37 | |
| Polo frontal derecho | 272 | 37 | 266 | 39 | 0,17 | 0,48 | -0,09 | - | 1,06 | 0,83 | 0,56 | |
| Polo frontal izquierdo | 205 | 31 | 197 | 30 | 0,25 | 0,34 | -0,23 | - | 0,91 | 1,35 | 0,39 | |
| Giro precentral derecho | 4821 | 526 | 4424 | 452 | 0,81 | 1,33 | 0,71 | - | 1,97 | 7,16 | **0,01** | |
| Giro precentral izquierdo | 4828 | 634 | 4406 | 456 | 0,77 | 0,98 | 0,38 | - | 1,58 | 6,64 | **0,01** | |
| **Parietal** |  |  |  |  |  |  |  |  |  |  |  | |
| Corteza cingulada posterior derecha | 1204 | 204 | 1187 | 171 | 0,09 | -0,06 | -0,63 | - | 0,51 | 0,40 | 0,76 | |
| Corteza cingulada posterior izquierda | 1142 | 163 | 1065 | 170 | 0,46 | 0,45 | -0,12 | - | 1,03 | 3,07 | 0,12 | |
| Corteza parietal inferior derecha | 5332 | 580 | 4737 | 596 | 1,01 | 1,33 | 0,70 | - | 1,95 | 9,97 | **<0,01** | |
| Corteza parietal inferior izquierda | 4526 | 513 | 4056 | 571 | 0,87 | 0,97 | 0,37 | - | 1,57 | 7,64 | **0,01** | |
| Istmo derecho | 918 | 141 | 897 | 140 | 0,15 | 0,25 | -0,32 | - | 0,82 | 0,72 | 0,61 | |
| Istmo izquierdo | 1001 | 187 | 937 | 183 | 0,34 | 0,43 | -0,15 | - | 1,00 | 2,06 | 0,24 | |
| Corteza parietal superior derecha | 5186 | 612 | 4980 | 505 | 0,37 | 0,45 | -0,12 | - | 1,03 | 2,27 | 0,21 | |
| Corteza parietal superior izquierda | 5255 | 538 | 5138 | 535 | 0,22 | 0,12 | -0,45 | - | 0,69 | 1,14 | 0,46 | |
| Giro poscentral derecho | 3851 | 398 | 3738 | 425 | 0,27 | 0,41 | -0,16 | - | 0,99 | 1,50 | 0,35 | |
| Giro poscentral izquierdo | 4033 | 431 | 3841 | 449 | 0,44 | 0,68 | 0,09 | - | 1,26 | 2,83 | 0,14 | |
| Giro supramarginal derecho | 3745 | 542 | 3603 | 403 | 0,30 | 0,49 | -0,09 | - | 1,07 | 1,70 | 0,31 | |
| Giro supramarginal izquierdo | 3837 | 578 | 3603 | 499 | 0,43 | 0,45 | -0,12 | - | 1,03 | 2,85 | 0,14 | |
| **Temporal** |  |  |  |  |  |  |  |  |  |  |  | |
| Corteza entorrinal derecha | 289 | 70 | 288 | 57 | 0,01 | 0,06 | -0,51 | - | 0,63 | 0,05 | 0,96 | |
| Corteza entorrinal izquierda | 370 | 60 | 351 | 71 | 0,29 | 0,33 | -0,24 | - | 0,90 | 1,61 | 0,33 | |
| Giro fusiforme derecho | 3048 | 336 | 2897 | 340 | 0,45 | 0,71 | 0,13 | - | 1,30 | 2,95 | 0,13 | |
| Giro fusiforme izquierdo | 3174 | 388 | 2881 | 295 | 0,85 | 0,89 | 0,30 | - | 1,49 | 7,64 | **0,01** | |
| Ínsula derecha | 2146 | 290 | 2010 | 208 | 0,54 | 0,67 | 0,09 | - | 1,26 | 3,90 | 0,07 | |
| Ínsula izquierda | 2144 | 224 | 1983 | 159 | 0,83 | 1,26 | 0,64 | - | 1,88 | 7,64 | **0,01** | |
| Giro parahipocampal derecho | 681 | 102 | 629 | 61 | 0,62 | 0,72 | 0,13 | - | 1,31 | 4,88 | **0,03** | |
| Giro parahipocampal izquierdo | 735 | 126 | 685 | 147 | 0,37 | 0,52 | -0,06 | - | 1,10 | 2,22 | 0,22 | |
| Polo temporal derecho | 403 | 59 | 392 | 70 | 0,17 | 0,25 | -0,32 | - | 0,82 | 0,84 | 0,56 | |
| Polo temporal izquierdo | 456 | 54 | 432 | 43 | 0,49 | 0,36 | -0,21 | - | 0,93 | 3,43 | 0,09 | |
| Precúneo derecho | 3897 | 430 | 3679 | 423 | 0,51 | 0,43 | -0,15 | - | 1,00 | 3,57 | 0,08 | |
| Precúneo izquierdo | 3822 | 450 | 3585 | 453 | 0,52 | 0,48 | -0,10 | - | 1,06 | 3,70 | 0,08 | |
| Márgenes del surco temporal inferior derecho | 916 | 147 | 877 | 157 | 0,25 | 0,09 | -0,48 | - | 0,66 | 1,37 | 0,39 | |
| Márgenes del surco temporal inferior izquierdo | 986 | 214 | 952 | 144 | 0,19 | 0,17 | -0,40 | - | 0,73 | 0,97 | 0,51 | |
| Giro temporal inferior derecho | 2958 | 349 | 2729 | 366 | 0,64 | 0,87 | 0,27 | - | 1,46 | 4,92 | **0,03** | |
| Giro temporal inferior izquierdo | 3137 | 423 | 2824 | 402 | 0,76 | 0,82 | 0,23 | - | 1,41 | 6,38 | **0,01** | |
| Giro temporal medio derecho | 3246 | 431 | 3008 | 379 | 0,59 | 0,63 | 0,05 | - | 1,20 | 4,38 | **0,05** | |
| Giro temporal medio izquierdo | 2930 | 453 | 2556 | 327 | 0,95 | 1 | 0,40 | - | 1,60 | 8,97 | **<0,01** | |
| Giro temporal superior derecho | 3509 | 411 | 3283 | 276 | 0,65 | 0,79 | 0,21 | - | 1,38 | 5,16 | **0,03** | |
| Giro temporal superior izquierdo | 3704 | 401 | 3434 | 432 | 0,65 | 0,65 | 0,07 | - | 1,24 | 5,01 | **0,03** | |
| Corteza temporal transversal derecha | 348 | 63 | 320 | 52 | 0,47 | 0,40 | -0,17 | - | 0,98 | 3,20 | 0,11 | |
| Corteza temporal transversal izquierda | 478 | 66 | 435 | 88 | 0,56 | 0,57 | -0,01 | - | 1,15 | 3,97 | 0,06 | |
| **Occipital** |  |  |  |  |  |  |  |  |  |  |  | |
| Cúneo derecho | 1497 | 215 | 1377 | 173 | 0,62 | 0,66 | 0,08 | - | 1,24 | 4,76 | **0,04** | |
| Cúneo izquierdo | 1424 | 169 | 1300 | 187 | 0,70 | 0,66 | 0,08 | - | 1,24 | 5,57 | **0,02** | |
| Corteza occipital lateral derecha | 4510 | 588 | 4163 | 518 | 0,63 | 0,69 | 0,10 | - | 1,27 | 4,84 | **0,04** | |
| Corteza occipital lateral izquierda | 4655 | 557 | 4211 | 506 | 0,83 | 0,87 | 0,28 | - | 1,47 | 7,38 | **0,01** | |
| Giro lingual derecho | 3064 | 326 | 2884 | 360 | 0,52 | 0,47 | -0,10 | - | 1,05 | 3,68 | 0,08 | |
| Giro lingual izquierdo | 3103 | 421 | 2818 | 418 | 0,68 | 0,57 | -0,01 | - | 1,15 | 5,38 | **0,02** | |
| Corteza pericalcarina derecha | 1506 | 232 | 1408 | 290 | 0,37 | 0,44 | -0,13 | - | 1,02 | 2,26 | 0,21 | |
| Corteza pericalcarina izquierda | 1374 | 217 | 1257 | 249 | 0,50 | 0,48 | -0,10 | - | 1,06 | 3,44 | 0,09 | |
| **Área cortical derecha** | 82363 | 7754 | 76957 | 6894 | 0,74 | 0,85 | 0,25 | - | 1,44 | 6,16 | **0,01** | |
| **Área cortical izquierda** | 82432 | 7889 | 76089 | 6907 | 0,86 | 0,92 | 0,33 | - | 1,52 | 7,64 | **0,01** | |
| Abreviaturas: DE=Desviación estándar, DME=Diferencia de medias estandarizada, DMEa= DME ajustada por edad sexo, escolaridad, enfermedad cardiovascular, número de episodios maniacos, antecedente de psicosis, intento suicida, uso de benzodiacepinas, alcohol y otras sustancias psicoactivas. | | | | | | | | | | | |

| **Tabla Suplementaria 3. Espesor en mm de regiones corticales de interés de pacientes con trastorno afectivo bipolar tipo I (TAB-I) según cada lóbulo cerebral** | | | | | | | | | | | | |
| --- | --- | --- | --- | --- | --- | --- | --- | --- | --- | --- | --- | --- |
| **REGIÓN** | | **LITIO**  **(N=22,45,6%)** | | **NO LITIO**  **(N=26 54,2%)** | |  | **DMEa** | **IC 95%** | | | **Valor s** | **Valor p** |
| **Media** | **DE** | **Media** | **DE** | **DME** |
| **Frontal** | |  |  |  |  |  |  |  |  |  |  |  |
| Corteza cingulada anterior caudal derecha | | 2,81 | 0,25 | 2,73 | 0,23 | 0,36 | 0,32 | -0,25 | - | 0,89 | 2,19 | 0,21 |
| Corteza cingulada anterior caudal izquierda | | 2,83 | 0,23 | 2,83 | 0,32 | 0,01 | -0,55 | -1,13 | - | 0,02 | 0,04 | 0,96 |
| Cíngulo anterior derecho | | 2,98 | 0,22 | 2,84 | 0,25 | 0,60 | 0,42 | -1,15 | - | 0,99 | 4,41 | **0,04** |
| Cíngulo anterior izquierdo | | 2,86 | 0,20 | 2,89 | 0,21 | 0,14 | -0,20 | -0,77 | - | 0,36 | 0,66 | 0,62 |
| Giro frontal medio caudal derecha | | 2,50 | 0,15 | 2,44 | 0,14 | 0,44 | 0,01 | -0,55 | - | 0,56 | 2,86 | 0,13 |
| Giro frontal medio caudal izquierda | | 2,53 | 0,16 | 2,47 | 0,11 | 0,44 | -0,03 | -0,60 | - | 0,53 | 2,94 | 0,13 |
| Giro frontal medio rostral derecho | | 2,50 | 0,15 | 2,44 | 0,14 | 0,01 | -0,36 | -0,94 | - | 0,20 | 0,02 | 0,98 |
| Giro frontal medio rostral izquierdo | | 2,30 | 0,11 | 2,30 | 0,12 | 0,26 | -0,32 | -0,89 | - | 0,24 | 1,45 | 0,36 |
| Giro frontal superior derecho | | 2,71 | 0,14 | 2,65 | 0,15 | 0,40 | -0,11 | -0,68 | - | 0,45 | 2,51 | 0,17 |
| Giro frontal superior izquierdo | | 2,72 | 0,16 | 2,65 | 0,12 | 0,47 | -0,13 | -0,70 | - | 0,43 | 3,23 | 0,10 |
| Corteza orbitofrontal lateral derecha | | 2,53 | 0,15 | 2,52 | 0,18 | 0,07 | -0,29 | -0,86 | - | 0,28 | 0,31 | 0,80 |
| Corteza orbitofrontal lateral izquierda | | 2,63 | 0,17 | 2,59 | 0,15 | 0,25 | -0,11 | -0,68 | - | 0,45 | 1,36 | 0,38 |
| Corteza orbitofrontal medial derecha | | 2,50 | 0,17 | 2,41 | 0,19 | 0,50 | 0,24 | -0,32 | - | 0,81 | 3,45 | 0,09 |
| Corteza orbitofrontal medial izquierda | | 2,43 | 0,18 | 2,42 | 0,17 | 0,00 | -0,37 | -0,94 | - | 0,19 | 0,01 | 0,99 |
| Lóbulo paracentral derecho | | 2,34 | 0,13 | 2,27 | 0,14 | 0,46 | 0,10 | -0,45 | - | 0,67 | 3,01 | 0,12 |
| Lóbulo paracentral izquierdo | | 2,37 | 0,13 | 2,26 | 0,14 | 0,75 | 0,28 | -0,28 | - | 0,85 | 6,15 | 0,01 |
| Pars opercularis derecha | | 2,53 | 0,16 | 2,43 | 0,13 | 0,67 | 0,13 | -0,43 | - | 0,70 | 5,38 | 0,02 |
| Pars opercularis izquierda | | 2,55 | 0,16 | 2,46 | 0,13 | 0,65 | 0,07 | -0,50 | - | 0,63 | 5,10 | 0,02 |
| Pars orbitalis derecha | | 2,60 | 0,20 | 2,60 | 0,19 | 0,02 | -0,16 | -0,72 | - | 0,40 | 0,06 | 0,95 |
| Pars orbitalis izquierda | | 2,70 | 0,19 | 2,66 | 0,23 | 0,20 | -0,24 | -0,81 | - | 0,32 | 1,00 | 0,50 |
| Pars triangularis derecha | | 2,36 | 0,13 | 2,32 | 0,13 | 0,25 | -0,07 | -0,64 | - | 0,49 | 1,32 | 0,39 |
| Pars triangularis izquierda | | 2,45 | 0,17 | 2,34 | 0,16 | 0,68 | 0,30 | -0,26 | - | 0,87 | 5,38 | 0,02 |
| Polo frontal derecho | | 2,82 | 0,32 | 2,73 | 0,28 | 0,30 | 0,16 | -0,40 | - | 0,73 | 1,73 | 0,30 |
| Polo frontal izquierdo | | 2,89 | 0,31 | 2,86 | 0,27 | 0,11 | -0,19 | -0,76 | - | 0,37 | 0,51 | 0,70 |
| Giro precentral derecho | | 2,51 | 0,12 | 2,44 | 0,14 | 0,55 | 0,14 | -0,42 | - | 0,70 | 3,92 | 0,06 |
| Giro precentral izquierdo | | 2,57 | 0,13 | 2,44 | 0,13 | 0,97 | 0,43 | -0,14 | - | 1,01 | 8,96 | **<0,01** |
| **Parietal** | |  |  |  |  |  |  |  |  |  |  |  |
| Corteza cingulada posterior derecha | | 2,56 | 0,18 | 2,49 | 0,17 | 0,44 | 0,29 | -0,27 | - | 0,86 | 2,87 | 0,13 |
| Corteza cingulada posterior izquierda | | 2,55 | 0,14 | 2,51 | 0,13 | 0,29 | -0,01 | -0,57 | - | 0,56 | 1,60 | 0,32 |
| Corteza parietal inferior derecha | | 2,48 | 0,12 | 2,41 | 0,14 | 0,50 | -0,11 | -0,67 | - | 0,45 | 3,42 | 0,09 |
| Corteza parietal inferior izquierda | | 2,50 | 0,13 | 2,44 | 0,15 | 0,46 | -0,11 | -0,67 | - | 0,45 | 3,03 | 0,12 |
| Istmo derecho | | 2,56 | 0,22 | 2,37 | 0,20 | 0,87 | 0,31 | -0,25 | - | 0,88 | 7,96 | **<0,01** |
| Istmo izquierdo | | 2,51 | 0,21 | 2,52 | 0,28 | 0,02 | -0,31 | -0,88 | - | 0,25 | 0,06 | 0,95 |
| Corteza parietal superior derecha | | 2,18 | 0,11 | 2,12 | 0,11 | 0,58 | 0,25 | -0,31 | - | 0,82 | 4,26 | 0,05 |
| Corteza parietal superior izquierda | | 2,19 | 0,10 | 2,12 | 0,12 | 0,58 | 0,07 | -0,49 | - | 0,64 | 4,29 | 0,05 |
| Giro poscentral derecho | | 2,10 | 0,11 | 2,03 | 0,11 | 0,68 | 0,37 | -0,20 | - | 0,94 | 5,38 | **0,02** |
| Giro poscentral izquierdo | | 2,12 | 0,11 | 2,04 | 0,11 | 0,75 | 0,43 | -0,13 | - | 1,01 | 6,38 | **0,01** |
| Giro supramarginal derecho | | 2,50 | 0,11 | 2,43 | 0,13 | 0,57 | 0,06 | -0,50 | - | 0,60 | 4,13 | 0,05 |
| Giro supramarginal izquierdo | | 2,51 | 0,12 | 2,44 | 0,14 | 0,53 | 0,10 | -0,46 | - | 0,67 | 3,77 | 0,07 |
| **Temporal** | |  |  |  |  |  |  |  |  |  |  |  |
| Corteza entorrinal derecha | | 3,40 | 0,27 | 3,41 | 0,37 | 0,03 | -0,47 | -1,05 | - | 0,10 | 0,10 | 0,93 |
| Corteza entorrinal izquierda | | 3,24 | 0,29 | 3,17 | 0,37 | 0,22 | 0,01 | -0,56 | - | 0,57 | 1,14 | 0,45 |
| Giro fusiforme derecho | | 2,68 | 0,16 | 2,61 | 0,16 | 0,46 | -0,09 | -0,66 | - | 0,47 | 3,10 | 0,11 |
| Giro fusiforme izquierdo | | 2,68 | 0,12 | 2,60 | 0,14 | 0,58 | 0,09 | -0,47 | - | 0,66 | 4,23 | 0,05 |
| Ínsula derecha | | 2,99 | 0,19 | 2,95 | 0,14 | 0,24 | -0,08 | -0,65 | - | 0,48 | 1,31 | 0,40 |
| Ínsula izquierda | | 3,05 | 0,18 | 2,98 | 0,11 | 0,41 | -0,01 | -0,57 | - | 0,55 | 2,70 | 0,15 |
| Giro parahipocampal derecho | | 2,76 | 0,22 | 2,65 | 0,25 | 0,46 | 0,17 | -0,39 | - | 0,74 | 3,02 | 0,12 |
| Giro parahipocampal izquierdo | | 2,80 | 0,31 | 2,71 | 0,37 | 0,25 | -0,16 | -0,73 | - | 0,40 | 1,36 | 0,39 |
| Polo temporal derecho | | 3,69 | 0,33 | 3,52 | 0,31 | 0,52 | 0,17 | -0,39 | - | 0,74 | 3,69 | 0,07 |
| Polo temporal izquierdo | | 3,49 | 0,25 | 3,49 | 0,27 | 0,02 | -0,26 | -0,83 | - | 0,30 | 0,07 | 0,94 |
| Precúneo derecho | | 2,33 | 0,13 | 2,26 | 0,11 | 0,59 | 0,24 | -0,32 | - | 0,81 | 4,47 | 0,04 |
| Precúneo izquierdo | | 2,33 | 0,13 | 2,28 | 0,13 | 0,42 | -0,04 | -0,61 | - | 0,51 | 2,69 | 0,15 |
| Márgenes del surco temporal inferior derecho | | 2,49 | 0,19 | 2,43 | 0,19 | 0,29 | 0,16 | -0,40 | - | 0,72 | 1,59 | 0,33 |
| Márgenes del surco temporal inferior izquierdo | | 2,41 | 0,17 | 2,29 | 0,19 | 0,66 | -0,19 | -0,76 | - | 0,37 | 5,10 | 0,02 |
| Giro temporal inferior derecho | | 2,85 | 0,15 | 2,81 | 0,17 | 0,25 | -0,14 | -0,71 | - | 0,41 | 1,32 | 0,40 |
| Giro temporal inferior izquierdo | | 2,85 | 0,16 | 2,80 | 0,19 | 0,32 | -0,05 | -0,62 | - | 0,50 | 1,82 | 0,28 |
| Giro temporal medio derecho | | 2,86 | 0,16 | 2,77 | 0,18 | 0,53 | -0,03 | -0,59 | - | 0,53 | 3,75 | 0,07 |
| Giro temporal medio izquierdo | | 2,84 | 0,17 | 2,77 | 0,16 | 0,41 | -0,02 | -0,59 | - | 0,54 | 2,65 | 0,15 |
| Giro temporal superior derecho | | 2,71 | 0,19 | 2,61 | 0,17 | 0,54 | 0,06 | -0,50 | - | 0,62 | 3,90 | 0,06 |
| Giro temporal superior izquierdo | | 2,74 | 0,15 | 2,63 | 0,14 | 0,72 | 0,33 | -0,23 | - | 0,90 | 5,87 | 0,01 |
| Corteza temporal transversal derecha | | 2,30 | 0,22 | 2,16 | 0,22 | 0,64 | 0,36 | -0,21 | - | 0,93 | 4,96 | 0,03 |
| Corteza temporal transversal izquierda | | 2,29 | 0,15 | 2,13 | 0,18 | 0,96 | 1,07 | 0,46 | - | 1,68 | 8,96 | **<0,01** |
| **Occipital** | |  |  |  |  |  |  |  |  |  |  |  |
| Cúneo derecho | | 1,50 | 0,22 | 1,38 | 0,17 | 0,98 | 0,63 | 0,05 | - | 1,21 | 8,96 | **<0,01** |
| Cúneo izquierdo | | 1,42 | 0,17 | 1,30 | 0,19 | 0,70 | 0,48 | -0,10 | - | 1,05 | 5,64 | 0,02 |
| Corteza occipital lateral derecha | | 4,51 | 0,59 | 4,16 | 0,52 | 1,01 | 0,41 | -0,15 | - | 0,99 | 9,96 | 0,00 |
| Corteza occipital lateral izquierda | | 4,65 | 0,56 | 4,21 | 0,51 | 0,70 | 0,07 | -0,49 | - | 0,63 | 5,64 | 0,02 |
| Giro lingual derecho | | 3,06 | 0,326, | 2,88 | 0,36 | 0,66 | 0,13 | -0,42 | - | 0,70 | 5,15 | 0,02 |
| Giro lingual izquierdo | | 3,10 | 0,42 | 2,82 | 0,42 | 0,47 | -0,09 | -0,65 | - | 0,47 | 3,15 | 0,11 |
| Corteza pericalcarina derecha | | 1,51 | 0,23 | 1,41 | 0,29 | 0,47 | 0,21 | -0,36 | - | 0,77 | 3,11 | 0,11 |
| Corteza pericalcarina izquierda | | 1,37 | 0,22 | 1,26 | 0,25 | 0,71 | 0,56 | -0,02 | - | 1,13 | 5,79 | **0,01** |
| **Espesor cortical derecho** | | 2,48 | 0,10 | 2,40 | 0,11 | 0,68 | 0,09 | -0,47 | - | 0,65 | 5,38 | 0,02 |
| **Espesor cortical izquierdo** | | 2,49 | 0,11 | 2,41 | 0,10 | 0,70 | 0,09 | -0,47 | - | 0,66 | 5,64 | 0,02 |
| Abreviaturas: DE=Desviación estándar, DME=Diferencia de medias estandarizada, DMEa= DME ajustada por edad sexo, escolaridad, enfermedad cardiovascular, número de episodios maniacos, antecedente de psicosis, intento suicida, uso de benzodiacepinas, alcohol y otras sustancias psicoactivas. | | | | | | | | | | | | |
